# Supplementary material
Source: PubMed Central journal article supplement (PMC10167600)

## Supplemental Online Content

Gareen IF, Gutman R, Sicks J, et al. Significant incidental findings in the National Lung Screening Trial. *JAMA Intern Med*. Published online May 8, 2023. doi:10.1001/jamainternmed.2023.11116

**eTable 1.** Number of significant incidental findings (SIFs) assessed by screening result and whether SIF should be reported to the primary care provider

**eTable 2.** Specific SIFs by whether they were considered reportable to the referring physician for the LDCT arm of the NLST, across all three screens (T0, T1, T2) by frequency of report

**eTable 3.** Specific SIFs considered reportable to the referring physician for the LDCT arm of the NLST, across all three screens (T0, T1, T2) by frequency of report

**eFigure.** Procedure used to categorize each screening examination

This supplemental material has been provided by the authors to give readers additional information about their work.

**eTable 1. Number of significant incidental findings (SIFs) assessed by screening result and whether SIF should be reported to the primary care provider. Participants enter the table once per time point screened. If at a single time point, they had both reportable and not-reportable SIFs, they were classified as “reportable.” Total number of SIFs was 13,728.**

| Time Point   | POS/SIF*    |                | NEG/SIF†    |                 | All SIFs     |                |
|--------------|-------------|----------------|-------------|-----------------|--------------|----------------|
|              | Reportable  | Not Reportable | Reportable  | Not Reportable‡ | Reportable   | Not Reportable |
|              | N (%)       | N (%)          | N (%)       | N (%)           | N (%)        | N (%)          |
| <b>T0</b>    | 2958 (93.3) | 214 (6.7)      | 2234 (82.9) | 460 (17.1)      | 5192 (88.5)  | 674 (11.5)     |
| <b>T1</b>    | 2791 (94.6) | 159 (5.4)      | 1240 (81.7) | 277 (18.3)      | 4031 (90.2)  | 436 (9.8)      |
| <b>T2</b>    | 1883 (94.8) | 103 (5.2)      | 1122 (79.6) | 287 (20.4)      | 3005 (88.5)  | 390 (11.5)     |
| <b>Total</b> | 7632 (94.1) | 476 (5.9)      | 4596 (81.8) | 1024 (18.2)     | 12228 (89.1) | 1500 (10.9)    |

\* POS/SIF: Positive screen/significant abnormalities

† NEG/SIF: Negative screen, significant abnormalities not suspicious for lung cancer.

‡ NEG/SIF Not Reportable column includes: 275 screens that had no comments and were therefore classified as not reportable: T0 N=112; T1 N=76; and at T2 N=87.

**eTable 2. Specific SIFs by whether they were considered reportable to the referring physician for the LDCT arm of the NLST, across all three screens (T0, T1, T2) by frequency of report. This table includes all SIFs reported in the LDCT arm of the NLST. The same SIF can appear more than once per participant if detected at different time points.**

|              |                |                                                                                                                                                             | CT             |      |
|--------------|----------------|-------------------------------------------------------------------------------------------------------------------------------------------------------------|----------------|------|
|              |                |                                                                                                                                                             | Number of SIFs |      |
|              |                |                                                                                                                                                             | N              | %    |
| Organ System |                | Classification                                                                                                                                              |                |      |
| Abdomen      | Not Reportable | Hiatal hernia, diaphragmatic hernia, Bochdalek hernia                                                                                                       | 252            | 1.3  |
|              |                | Renal calculus, renal atrophy, renal asymmetry, low attenuation lesion                                                                                      | 236            | 1.2  |
|              |                | Gallstones, cholelithiasis                                                                                                                                  | 224            | 1.1  |
|              |                | Adrenal thickening/prominence/enlargement/fullness and adenoma                                                                                              | 140            | 0.7  |
|              |                | Liver lesion if < 1cm, or any size with benign features (sharp margin, < 20 HU on unenhanced CT). Include "cysts", "hypodensities", "LDL" as not actionable | 126            | 0.6  |
|              |                | Splenic cysts; granulomas                                                                                                                                   | 90             | 0.4  |
|              |                | Fatty liver, focal fatty attenuation. Hepatic calcification                                                                                                 | 89             | 0.4  |
|              |                | Aorta described as ectatic (or dilated) or tortuous but no diameter provided                                                                                | 54             | 0.3  |
|              |                | Dilated esophagus, Air-fluid level in esophagus                                                                                                             | 32             | 0.2  |
|              |                | GB wall calcification including porcelain gallbladder                                                                                                       | 29             | 0.1  |
|              |                | Calcific pancreatitis, pancreatic calcification                                                                                                             | 21             | 0.1  |
|              |                | Pneumobilia                                                                                                                                                 | 2              | <0.1 |
|              |                | Epiphrenic or esophageal diverticulum                                                                                                                       | 1              | <0.1 |
|              |                | Prior abdominal surgery                                                                                                                                     | 1              | <0.1 |
|              | Reportable     | Renal mass                                                                                                                                                  | 647            | 3.2  |
|              |                | Liver lesion No Size                                                                                                                                        | 420            | 2.1  |
|              |                | Adrenal nodule or mass and not further characterized as benign                                                                                              | 265            | 1.3  |

|                |                | CT                                                                                                                                                                                                                                   |     |      |
|----------------|----------------|--------------------------------------------------------------------------------------------------------------------------------------------------------------------------------------------------------------------------------------|-----|------|
|                |                | Number of SIFs                                                                                                                                                                                                                       |     |      |
|                |                | N                                                                                                                                                                                                                                    | %   |      |
|                |                | Liver: only if suspicious feature such as irregular margins, heterogeneous density. Included if description was "possible liver lesions" without enough detail to confirm benign. Include lesions for which US or MR was recommended | 143 | 0.7  |
|                |                | Renal cyst; complex renal cyst                                                                                                                                                                                                       | 134 | 0.7  |
|                |                | Abdominal aortic aneurysm                                                                                                                                                                                                            | 52  | 0.3  |
|                |                | Thickening of the distal esophagus or gastric cardia                                                                                                                                                                                 | 45  | 0.2  |
|                |                | Renal contour abnormality                                                                                                                                                                                                            | 39  | 0.2  |
|                |                | All focal pancreatic lesions, cystic or solid                                                                                                                                                                                        | 33  | 0.2  |
|                |                | Dilated renal pelvis; hydronephrosis                                                                                                                                                                                                 | 30  | 0.1  |
|                |                | Cirrhosis                                                                                                                                                                                                                            | 22  | 0.1  |
|                |                | Splenomegaly                                                                                                                                                                                                                         | 18  | <0.1 |
|                |                | Main pancreatic duct dilation, pancreatic mass                                                                                                                                                                                       | 17  | <0.1 |
|                |                | Ascites                                                                                                                                                                                                                              | 16  | <0.1 |
|                |                | Abdominal mass or lymphadenopathy, requiring further follow-up                                                                                                                                                                       | 13  | <0.1 |
|                |                | Esophageal mass                                                                                                                                                                                                                      | 10  | <0.1 |
|                |                | Suspected mass in GI tract                                                                                                                                                                                                           | 8   | <0.1 |
|                |                | Gallbladder mass                                                                                                                                                                                                                     | 6   | <0.1 |
|                |                | Paraesophageal hernia                                                                                                                                                                                                                | 4   | <0.1 |
|                |                | Intraabdominal lymphadenopathy                                                                                                                                                                                                       | 4   | <0.1 |
|                |                | enlarged multicystic/polycystic kidneys                                                                                                                                                                                              | 3   | <0.1 |
|                |                | Hepatomegaly                                                                                                                                                                                                                         | 3   | <0.1 |
|                |                | GB wall thickening                                                                                                                                                                                                                   | 1   | <0.1 |
|                |                | Splenic mass, not calcified and not clearly a cyst, requiring further follow-up                                                                                                                                                      | 1   | <0.1 |
|                |                | Colonic diverticulitis                                                                                                                                                                                                               | 1   | <0.1 |
| Cardiovascular | Not Reportable | ASCVD NOS (no mention of CAC)                                                                                                                                                                                                        | 245 | 1.2  |
|                |                | Prior cardiac surgery (CAD)                                                                                                                                                                                                          | 136 | 0.7  |
|                |                | Small pericardial effusion                                                                                                                                                                                                           | 39  | 0.2  |
|                |                | Cardiomegaly                                                                                                                                                                                                                         | 32  | 0.2  |

|                                                                                           |                                                                                                                      |                                                                                                       | CT                                                     |                                                                |
|-------------------------------------------------------------------------------------------|----------------------------------------------------------------------------------------------------------------------|-------------------------------------------------------------------------------------------------------|--------------------------------------------------------|----------------------------------------------------------------|
|                                                                                           |                                                                                                                      |                                                                                                       | Number of SIFs                                         |                                                                |
|                                                                                           |                                                                                                                      |                                                                                                       | N                                                      | %                                                              |
|                                                                                           |                                                                                                                      | Mitral valve or annulus calcification                                                                 | 22                                                     | 0.1                                                            |
|                                                                                           |                                                                                                                      | Coronary artery calcification WITH EVIDENCE of a prior CABG or stent                                  | 12                                                     | <0.1                                                           |
|                                                                                           |                                                                                                                      | Pericardial cyst No Size                                                                              | 11                                                     | <0.1                                                           |
|                                                                                           |                                                                                                                      | Congenital abnormalities such as anomalous pulmonary vein from RUL, right aortic arch; situs inversus | 5                                                      | <0.1                                                           |
|                                                                                           | Reportable                                                                                                           | Coronary artery calcification NO EVIDENCE of a prior CABG or stent                                    | 2,432                                                  | 12.1                                                           |
|                                                                                           |                                                                                                                      | Significant cardiovascular abnormality, not specified                                                 | 904                                                    | 4.5                                                            |
|                                                                                           |                                                                                                                      | Aortic aneurysm                                                                                       | 198                                                    | 1.0                                                            |
|                                                                                           |                                                                                                                      | Aortic valve calcification                                                                            | 70                                                     | 0.3                                                            |
|                                                                                           |                                                                                                                      | Pericardial effusion (unless specified as trace or small)                                             | 69                                                     | 0.3                                                            |
|                                                                                           |                                                                                                                      | Pericardial thickening if unexplained; pericardial calcification                                      | 60                                                     | 0.3                                                            |
|                                                                                           |                                                                                                                      | Pulmonary artery enlargement; pulmonary artery hypertension; pulmonary artery calcification; No Size  | 57                                                     | 0.3                                                            |
|                                                                                           |                                                                                                                      | Edema, heart failure                                                                                  | 11                                                     | <0.1                                                           |
|                                                                                           |                                                                                                                      | Aortic dissection, acute or chronic                                                                   | 6                                                      | <0.1                                                           |
|                                                                                           |                                                                                                                      | Mediastinal                                                                                           | Not Reportable                                         | Lymph node < 1.5 cm short axis; lymph nodes described as small |
| Lipoma, fatty tumor                                                                       | 19                                                                                                                   |                                                                                                       |                                                        | <0.1                                                           |
| Mass that is clearly cystic (HU < 20) (presumed bronchogenic cyst or hygroma for example) | 16                                                                                                                   |                                                                                                       |                                                        | <0.1                                                           |
| Reportable                                                                                | Lymph node No Size, described as enlarged, adenopathy or lymphadenopathy                                             |                                                                                                       | 110                                                    | 0.5                                                            |
|                                                                                           | Mediastinal mass (if not clearly cystic)                                                                             |                                                                                                       | 51                                                     | 0.3                                                            |
|                                                                                           | Lymph node >1.5 cm short axis without benign features; anything described as enlarged, adenopathy or lymphadenopathy |                                                                                                       | 6                                                      | <0.1                                                           |
|                                                                                           | Hilum described as enlarged/large                                                                                    |                                                                                                       | 4                                                      | <0.1                                                           |
| Neck and Thoracic Inlet                                                                   | Not Reportable                                                                                                       |                                                                                                       | Thyroid enlargement with no mention of nodules; goiter | 152                                                            |
|                                                                                           |                                                                                                                      | Thymus – residual thymic tissue, thymic hyperplasia, thymic cyst                                      | 10                                                     | <0.1                                                           |
|                                                                                           |                                                                                                                      | Thyroid – nodule < 1.5 cm. Focal thyroid calcification                                                | 8                                                      | <0.1                                                           |

|                                                                          |                |                                                                                                                                         | CT             |      |
|--------------------------------------------------------------------------|----------------|-----------------------------------------------------------------------------------------------------------------------------------------|----------------|------|
|                                                                          |                |                                                                                                                                         | Number of SIFs |      |
|                                                                          |                |                                                                                                                                         | N              | %    |
|                                                                          | Reportable     | Thyroid nodule                                                                                                                          | 92             | 0.5  |
|                                                                          |                | Tracheal nodule, polyp or mass                                                                                                          | 38             | 0.2  |
|                                                                          |                | Thymoma, thymic mass, nodule                                                                                                            | 12             | <0.1 |
|                                                                          |                | Neck mass, requiring further follow-up                                                                                                  | 1              | <0.1 |
| Not SIFs                                                                 | Not Reportable | Not an SIF                                                                                                                              | 68             | 0.3  |
|                                                                          |                | Pleural mass, not SIFs                                                                                                                  | 1              | <0.1 |
| Other SIF                                                                | Not Reportable | Other SIF                                                                                                                               | 1,859          | 9.2  |
| Pleural                                                                  | Not Reportable | Pleural plaques , calcification, thickening                                                                                             | 109            | 0.5  |
|                                                                          | Reportable     | Pleural effusion                                                                                                                        | 21             | 0.1  |
| Pulmonary                                                                | Not Reportable | Bronchiectasis                                                                                                                          | 185            | 0.9  |
|                                                                          |                | Scars; localized fibrosis; rounded atelectasis                                                                                          | 143            | 0.7  |
|                                                                          |                | Centrilobular nodules, respiratory bronchiolitis (common in smokers) (might be able to lump with Langerhans)                            | 54             | 0.3  |
|                                                                          |                | Calcified granuloma; hamartoma                                                                                                          | 51             | 0.3  |
|                                                                          |                | Mosaic attenuation pattern                                                                                                              | 17             | <0.1 |
|                                                                          |                | Lung cyst with benign features (cystic lesion, thin-walled lesion) i.e., no specifics as to abnormalities that might make it suspicious | 15             | <0.1 |
|                                                                          |                | Atelectasis less than segmental                                                                                                         | 5              | <0.1 |
|                                                                          | Reportable     | Emphysema, COPD, hyperinflation, Code 59 with no comments                                                                               | 8,677          | 43.0 |
|                                                                          |                | Diffuse or patchy ground glass opacification                                                                                            | 253            | 1.3  |
|                                                                          |                | Consolidation; pneumonia                                                                                                                | 149            | 0.7  |
|                                                                          |                | Atelectasis that involves an entire segment, lobe, or lung                                                                              | 74             | 0.4  |
|                                                                          |                | Interstitial lung disease; UIP; IPF                                                                                                     | 71             | 0.4  |
|                                                                          |                | Suspected metastatic disease (multiple nodules)                                                                                         | 16             | <0.1 |
|                                                                          |                | Tree-in-bud pattern that suggests pneumonia or aspiration (different pattern of pneumonia)                                              | 1              | <0.1 |
| Lung cyst with suspicious features (nodular wall, focal wall thickening) | 1              | <0.1                                                                                                                                    |                |      |

|                                |                |                                                 | CT             |       |
|--------------------------------|----------------|-------------------------------------------------|----------------|-------|
|                                |                |                                                 | Number of SIFs |       |
|                                |                |                                                 | N              | %     |
| Thoracic, Misc, and Chest Wall | Not Reportable | Gynecomastia; breast asymmetry; implant rupture | 31             | 0.2   |
|                                |                | Subcutaneous nodule or cyst or fatty lesion     | 7              | <0.1  |
|                                |                | Vertebral compression fracture/osteopenia       | 3              | <0.1  |
|                                |                | Scoliosis                                       | 3              | <0.1  |
|                                |                | Breast surgery/mastectomy                       | 3              | <0.1  |
|                                |                | Bone lesion described as diffusely sclerotic    | 2              | <0.1  |
|                                |                | Axillary lymph node < 2 cm                      | 1              | <0.1  |
|                                |                | Degenerative disc disease                       | 1              | <0.1  |
|                                |                | Healed rib fractures                            | 1              | <0.1  |
|                                | Reportable     | Breast – nodule, mass                           | 161            | 0.8   |
|                                |                | Axillary lymph nodes >= 2 cm or NOS             | 52             | 0.3   |
|                                |                | Paraspinal mass                                 | 19             | <0.1  |
|                                |                | Acute fracture                                  | 10             | <0.1  |
|                                |                | Bone lesion described as lytic/expansile        | 5              | <0.1  |
|                                |                | Chest wall mass, requiring further follow-up    | 1              | <0.1  |
| <b>Total</b>                   |                |                                                 | 20,156         | 100.0 |

**eTable 3. Specific SIFs considered reportable to the referring physician for the LDCT arm of the NLST, across all three screens (T0, T1, T2) by frequency of report. This table includes all SIFs reported in the LDCT arm of the NLST. Each SIF appears only once per participant.**

|              |                |                                                                                                                                                                                                                                      | CT             |      |
|--------------|----------------|--------------------------------------------------------------------------------------------------------------------------------------------------------------------------------------------------------------------------------------|----------------|------|
|              |                |                                                                                                                                                                                                                                      | Number of SIFs |      |
|              |                |                                                                                                                                                                                                                                      | N              | %    |
| Organ System |                | Classification                                                                                                                                                                                                                       |                |      |
| Abdomen      | Not Reportable | Renal calculus, renal atrophy, renal asymmetry, low attenuation lesion                                                                                                                                                               | 200            | 1.3  |
|              |                | Hiatal hernia, diaphragmatic hernia, Bochdalek hernia                                                                                                                                                                                | 189            | 1.2  |
|              |                | Gallstones, cholelithiasis                                                                                                                                                                                                           | 180            | 1.2  |
|              |                | Adrenal thickening/prominence/enlargement/fullness and adenoma                                                                                                                                                                       | 133            | 0.9  |
|              |                | Liver lesion if < 1cm, or any size with benign features (sharp margin, < 20 HU on unenhanced CT). Include "cysts", "hypodensities", "LDL" as not actionable                                                                          | 117            | 0.8  |
|              |                | Splenic cysts; granulomas                                                                                                                                                                                                            | 79             | 0.5  |
|              |                | Fatty liver, focal fatty attenuation. Hepatic calcification                                                                                                                                                                          | 72             | 0.5  |
|              |                | Aorta described as ectatic (or dilated) or tortuous but no diameter provided                                                                                                                                                         | 45             | 0.3  |
|              |                | GB wall calcification including porcelain gallbladder                                                                                                                                                                                | 26             | 0.2  |
|              |                | Dilated esophagus, Air-fluid level in esophagus                                                                                                                                                                                      | 23             | 0.2  |
|              |                | Calcific pancreatitis, pancreatic calcification                                                                                                                                                                                      | 18             | 0.1  |
|              |                | Pneumobilia                                                                                                                                                                                                                          | 2              | <0.1 |
|              |                | Epiphrenic or esophageal diverticulum                                                                                                                                                                                                | 1              | <0.1 |
|              |                | Prior abdominal surgery                                                                                                                                                                                                              | 1              | <0.1 |
|              | Reportable     | Renal mass                                                                                                                                                                                                                           | 524            | 3.4  |
|              |                | Liver lesion No Size                                                                                                                                                                                                                 | 352            | 2.3  |
|              |                | Adrenal nodule or mass and not further characterized as benign                                                                                                                                                                       | 220            | 1.4  |
|              |                | Liver: only if suspicious feature such as irregular margins, heterogeneous density. Included if description was "possible liver lesions" without enough detail to confirm benign. Include lesions for which US or MR was recommended | 136            | 0.9  |
|              |                | Renal cyst; complex renal cyst                                                                                                                                                                                                       | 117            | 0.8  |
|              |                | Abdominal aortic aneurysm                                                                                                                                                                                                            | 43             | 0.3  |



|                |                | CT                                                                                                    |       |      |
|----------------|----------------|-------------------------------------------------------------------------------------------------------|-------|------|
|                |                | Number of SIFs                                                                                        |       |      |
|                |                | N                                                                                                     | %     |      |
|                |                | Thickening of the distal esophagus or gastric cardia                                                  | 42    | 0.3  |
|                |                | Renal contour abnormality                                                                             | 39    | 0.3  |
|                |                | Dilated renal pelvis; hydronephrosis                                                                  | 27    | 0.2  |
|                |                | All focal pancreatic lesions, cystic or solid                                                         | 27    | 0.2  |
|                |                | Main pancreatic duct dilation, pancreatic mass                                                        | 16    | 0.1  |
|                |                | Splenomegaly                                                                                          | 15    | <0.1 |
|                |                | Ascites                                                                                               | 14    | <0.1 |
|                |                | Abdominal mass or lymphadenopathy, requiring further follow-up                                        | 13    | <0.1 |
|                |                | Cirrhosis                                                                                             | 11    | <0.1 |
|                |                | Esophageal mass                                                                                       | 9     | <0.1 |
|                |                | Suspected mass in GI tract                                                                            | 7     | <0.1 |
|                |                | Paraesophageal hernia                                                                                 | 4     | <0.1 |
|                |                | Gallbladder mass                                                                                      | 4     | <0.1 |
|                |                | Intraabdominal lymphadenopathy                                                                        | 4     | <0.1 |
|                |                | enlarged multicystic/polycystic kidneys                                                               | 3     | <0.1 |
|                |                | Hepatomegaly                                                                                          | 3     | <0.1 |
|                |                | GB wall thickening                                                                                    | 1     | <0.1 |
|                |                | Splenic mass, not calcified and not clearly a cyst, requiring further follow-up                       | 1     | <0.1 |
|                |                | Colonic diverticulitis                                                                                | 1     | <0.1 |
| Cardiovascular | Not Reportable | ASCVD NOS (no mention of CAC)                                                                         | 236   | 1.6  |
|                |                | Prior cardiac surgery (CAD)                                                                           | 128   | 0.8  |
|                |                | Small pericardial effusion                                                                            | 37    | 0.2  |
|                |                | Cardiomegaly                                                                                          | 28    | 0.2  |
|                |                | Mitral valve or annulus calcification                                                                 | 16    | 0.1  |
|                |                | Coronary artery calcification WITH EVIDENCE of a prior CABG or stent                                  | 12    | <0.1 |
|                |                | Pericardial cyst No Size                                                                              | 11    | <0.1 |
|                |                | Congenital abnormalities such as anomalous pulmonary vein from RUL, right aortic arch; situs inversus | 5     | <0.1 |
|                | Reportable     | Coronary artery calcification NO EVIDENCE of a prior CABG or stent                                    | 1,776 | 11.7 |
|                |                | Significant cardiovascular abnormality, not specified                                                 | 677   | 4.5  |

|                         |                |                                                                                                                      | CT             |      |
|-------------------------|----------------|----------------------------------------------------------------------------------------------------------------------|----------------|------|
|                         |                |                                                                                                                      | Number of SIFs |      |
|                         |                |                                                                                                                      | N              | %    |
|                         |                | Aortic aneurysm                                                                                                      | 159            | 1.0  |
|                         |                | Aortic valve calcification                                                                                           | 62             | 0.4  |
|                         |                | Pericardial thickening if unexplained; pericardial calcification                                                     | 53             | 0.3  |
|                         |                | Pericardial effusion (unless specified as trace or small)                                                            | 50             | 0.3  |
|                         |                | Pulmonary artery enlargement; pulmonary artery hypertension; pulmonary artery calcification; No Size                 | 44             | 0.3  |
|                         |                | Edema, heart failure                                                                                                 | 11             | <0.1 |
|                         |                | Aortic dissection, acute or chronic                                                                                  | 6              | <0.1 |
| Mediastinal             | Not Reportable | Lymph node < 1.5 cm short axis; lymph nodes described as small                                                       | 21             | 0.1  |
|                         |                | Lipoma, fatty tumor                                                                                                  | 19             | 0.1  |
|                         |                | Mass that is clearly cystic (HU < 20) (presumed bronchogenic cyst or hygroma for example)                            | 14             | <0.1 |
|                         | Reportable     | Lymph node No Size, described as enlarged, adenopathy or lymphadenopathy                                             | 103            | 0.7  |
|                         |                | Mediastinal mass (if not clearly cystic)                                                                             | 43             | 0.3  |
|                         |                | Lymph node >1.5 cm short axis without benign features; anything described as enlarged, adenopathy or lymphadenopathy | 6              | <0.1 |
|                         |                | Hilum described as enlarged/large                                                                                    | 4              | <0.1 |
| Neck and Thoracic Inlet | Not Reportable | Thyroid enlargement with no mention of nodules; goiter                                                               | 134            | 0.9  |
|                         |                | Thyroid – nodule < 1.5 cm. Focal thyroid calcification                                                               | 8              | <0.1 |
|                         |                | Thymus – residual thymic tissue, thymic hyperplasia, thymic cyst                                                     | 8              | <0.1 |
|                         | Reportable     | Thyroid nodule                                                                                                       | 79             | 0.5  |
|                         |                | Tracheal nodule, polyp or mass                                                                                       | 35             | 0.2  |
|                         |                | Thymoma, thymic mass, nodule                                                                                         | 12             | <0.1 |
|                         |                | Neck mass, requiring further follow-up                                                                               | 1              | <0.1 |
| Not SIFs                | Not Reportable | Not an SIF                                                                                                           | 65             | 0.4  |
|                         |                | Pleural mass, not SIFs                                                                                               | 1              | <0.1 |
| Other SIF               | Not Reportable | Other SIF                                                                                                            | 1,663          | 10.9 |
| Pleural                 | Not Reportable | Pleural plaques, calcification, thickening                                                                           | 99             | 0.7  |
|                         | Reportable     | Pleural effusion                                                                                                     | 21             | 0.1  |
| Pulmonary               |                | Bronchiectasis                                                                                                       | 161            | 1.1  |

|                                              |                                |                                                                                                                                         | CT                                              |      |
|----------------------------------------------|--------------------------------|-----------------------------------------------------------------------------------------------------------------------------------------|-------------------------------------------------|------|
|                                              |                                |                                                                                                                                         | Number of SIFs                                  |      |
|                                              |                                |                                                                                                                                         | N                                               | %    |
|                                              | Not Reportable                 | Scars; localized fibrosis; rounded atelectasis                                                                                          | 131                                             | 0.9  |
|                                              |                                | Centrilobular nodules, respiratory bronchiolitis (common in smokers) (might be able to lump with Langerhans)                            | 51                                              | 0.3  |
|                                              |                                | Calcified granuloma; hamartoma                                                                                                          | 43                                              | 0.3  |
|                                              |                                | Lung cyst with benign features (cystic lesion, thin-walled lesion) i.e., no specifics as to abnormalities that might make it suspicious | 15                                              | <0.1 |
|                                              |                                | Mosaic attenuation pattern                                                                                                              | 13                                              | <0.1 |
|                                              |                                | Atelectasis less than segmental                                                                                                         | 5                                               | <0.1 |
|                                              | Reportable                     | Emphysema, COPD, hyperinflation, Code 59 with no comments                                                                               | 5,636                                           | 37.1 |
|                                              |                                | Diffuse or patchy ground glass opacification                                                                                            | 236                                             | 1.6  |
|                                              |                                | Consolidation; pneumonia                                                                                                                | 148                                             | 1.0  |
|                                              |                                | Atelectasis that involves an entire segment, lobe, or lung                                                                              | 74                                              | 0.5  |
|                                              |                                | Interstitial lung disease; UIP; IPF                                                                                                     | 70                                              | 0.5  |
|                                              |                                | Suspected metastatic disease (multiple nodules)                                                                                         | 15                                              | <0.1 |
|                                              |                                | Tree-in-bud pattern that suggests pneumonia or aspiration (different pattern of pneumonia)                                              | 1                                               | <0.1 |
|                                              |                                | Lung cyst with suspicious features (nodular wall, focal wall thickening)                                                                | 1                                               | <0.1 |
|                                              | Thoracic, Misc, and Chest Wall | Not Reportable                                                                                                                          | Gynecomastia; breast asymmetry; implant rupture | 27   |
| Subcutaneous nodule or cyst or fatty lesion  |                                |                                                                                                                                         | 7                                               | <0.1 |
| Scoliosis                                    |                                |                                                                                                                                         | 3                                               | <0.1 |
| Breast surgery/mastectomy                    |                                |                                                                                                                                         | 3                                               | <0.1 |
| Vertebral compression fracture/osteopenia    |                                |                                                                                                                                         | 2                                               | <0.1 |
| Bone lesion described as diffusely sclerotic |                                |                                                                                                                                         | 2                                               | <0.1 |
| Axillary lymph node < 2 cm                   |                                |                                                                                                                                         | 1                                               | <0.1 |
| Degenerative disc disease                    |                                |                                                                                                                                         | 1                                               | <0.1 |
| Healed rib fractures                         |                                |                                                                                                                                         | 1                                               | <0.1 |
| Reportable                                   |                                | Breast – nodule, mass                                                                                                                   | 121                                             | 0.8  |
|                                              |                                | Axillary lymph nodes >= 2 cm or NOS                                                                                                     | 44                                              | 0.3  |
|                                              |                                | Paraspinal mass                                                                                                                         | 13                                              | <0.1 |
|                                              |                                | Acute fracture                                                                                                                          | 9                                               | <0.1 |
|                                              |                                | Bone lesion described as lytic/expansile                                                                                                | 3                                               | <0.1 |

|              |                                              | CT             |       |
|--------------|----------------------------------------------|----------------|-------|
|              |                                              | Number of SIFs |       |
|              |                                              | N              | %     |
|              | Chest wall mass, requiring further follow-up | 1              | <0.1  |
| <b>Total</b> |                                              | 15,204         | 100.0 |

**eFigure. Procedure used to categorize each screening examination. Includes 75,126 screening examinations, classified as positive with significant incidental findings (POS/SIF), Negative with significant incidental findings (NEG/SIF), Positive (POS), or Negative (NEG), based on final diagnosis and abnormalities reported at that screening examination.**

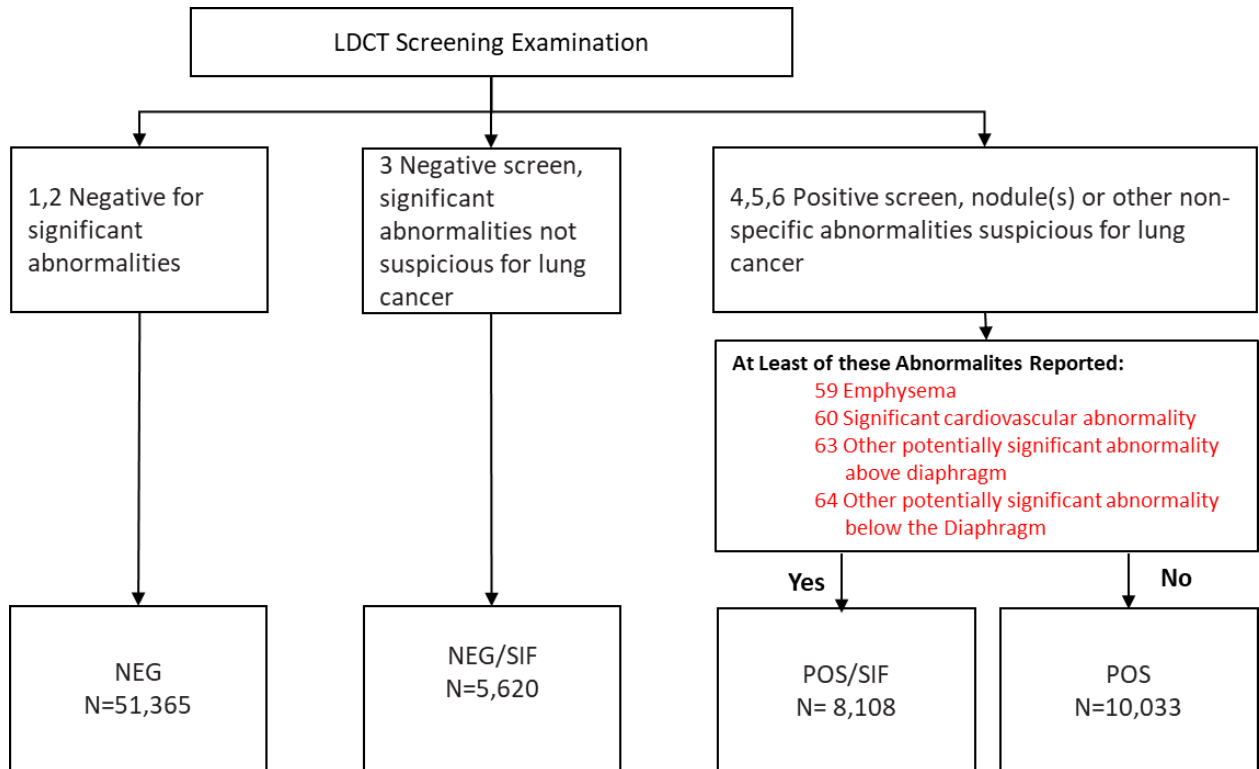

Supplement: jamainternmed-e231116-s001.pdf [file jamainternmed-e231116-s001.pdf]
