# Supplementary material
Source: PubMed Central journal article supplement (PMC10167600)
Supplement: jamainternmed-e231116-s002.pdf [file jamainternmed-e231116-s002.pdf]

## Data Sharing Statement

Gareen. Significant Incidental Findings in the National Lung Screening Trial. *JAMA Intern Med*. Published May 08, 2023. doi:10.1001/jamainternmed.2023.1116

### Data

**Data available:** Yes

**Data types:** Deidentified participant data

**How to access data:** <https://cdas.cancer.gov/>

**When available:** beginning date: 12-31-2024

### Supporting Documents

**Document types:** None

### Additional Information

**Who can access the data:** National Lung Screening Trial data are available through a data request to <https://cdas.cancer.gov/nlst/>

**Types of analyses:** All data requests are reviewed by NCI Trial Leadership.

**Mechanisms of data availability:** After approval of Research Proposal.
